20 **Abstract**

21 Whole genome duplication (polyploidization) is among the most dramatic mutational  
22 processes in nature, so understanding how natural selection differs in polyploids relative  
23 to diploids is an important goal. Population genetics theory predicts that recessive  
24 deleterious mutations accumulate faster in allopolyploids than diploids due to the  
25 masking effect of redundant gene copies, but this prediction is hitherto unconfirmed.  
26 Here, we use the cotton genus (*Gossypium*), which contains seven allopolyploids  
27 derived from a single polyploidization event 1-2 million years ago, to investigate  
28 deleterious mutation accumulation. We use two methods of identifying deleterious  
29 mutations at the nucleotide and amino acid level, along with whole-genome  
30 resequencing of 43 individuals spanning six allopolyploid species and their two diploid  
31 progenitors, to demonstrate that deleterious mutations accumulate faster in  
32 allopolyploids than in their diploid progenitors. We find that, unlike what would be  
33 expected under models of demographic changes alone, strongly deleterious mutations  
34 show the biggest difference between ploidy levels, and this effect diminishes for  
35 moderately and mildly deleterious mutations. We further show that the proportion of  
36 nonsynonymous mutations that are deleterious differs between the two co-resident  
37 subgenomes in the allopolyploids, suggesting that homoeologous masking acts  
38 unequally between subgenomes. Our results provide a genome-wide perspective on  
39 classic notions of the significance of gene duplication that likely are broadly applicable  
40 to allopolyploids, with implications for our understanding of the evolutionary fate of  
41 deleterious mutations. Finally, we note that some measures of selection (e.g.  $dN/dS$ ,  
42  $\pi_N/\pi_S$ ) may be biased when species of different ploidy levels are compared.

43

## 44 **Introduction**

45 Genome duplication (polyploidy) is among the most dramatic mutational processes in  
46 nature, causing myriad saltational changes at the cellular and organismal levels (Doyle  
47 and Coate 2019; Bomblies 2020; Fernandes Gyorfy et al. 2021), and is associated with  
48 consequential phenomena ranging from crop domestication (Renny-Byfield and Wendel  
49 2014; Qi et al. 2021) to cancer progression (Matsumoto et al. 2021). Polyploidy is  
50 especially common in the angiosperms, with all extant species having experienced at  
51 least one or more polyploidy events during their evolutionary history (Jiao et al. 2011),  
52 and at least 30% of currently recognized species having a polyploidy event in the recent  
53 past (One Thousand Plant Transcriptomes Initiative 2019).

54       Novel evolutionary patterns created by polyploidy at the genic (e.g.  
55 neofunctionalization, subfunctionalization, and loss (Kuzmin et al. 2021)) and genomic  
56 (e.g., homoeologous recombination (Mason and Wendel 2020)) levels have been well  
57 documented across taxa, including the frequent asymmetry of these responses with  
58 respect to co-resident genomes in a polyploid nucleus. Nonetheless, many questions  
59 remain regarding the effects of natural selection on polyploid relative to diploid genomes  
60 (Baduel et al. 2019; Monnahan et al. 2019) and the interplay between these novel  
61 evolutionary patterns and the long-term trajectories of genome evolution (Qi et al. 2021)  
62 following polyploidization (e.g. biased fractionation).

63       One of the earliest predictions about natural selection in polyploids relative to  
64 diploids is that putatively deleterious mutations may accumulate faster due to the  
65 masking effect of completely or partially recessive deleterious mutations in duplicated

66 genes (Haldane 1932; Hill 1970; Bever and Felber 1992). Only recently, however, have  
67 these predictions begun to be evaluated in young allopolyploids such as *Arabidopsis*  
68 *kamchatica* (Paape et al. 2018) and *Capsella bursa-pastoris* (Douglas et al. 2015;  
69 *Kryvokhyzha*, Salcedo, et al. 2019; *Kryvokhyzha*, Milesi, et al. 2019), and autotetraploid  
70 *Arabidopsis arenosa* (Monnahan et al. 2019). Because the number of deleterious  
71 mutations is strongly influenced by shifts in demography and mating system (Brandvain  
72 and Wright 2016), which may coincide with polyploid formation (Grant 1981; Barringer  
73 2007), a clear link between ploidy level and the accumulation of deleterious mutations is  
74 challenging to demonstrate in natural polyploid populations.

75         The cotton genus (*Gossypium*) represents one of the best studied allopolyploid  
76 systems (Wendel and Grover 2015; Hu et al. 2021). The genus includes approximately  
77 45 currently recognized diploid species classified into eight genome groups (A-G, and  
78 K), and seven allopolyploid species resulting from a single (Grover et al. 2012)  
79 allopolyploidization event ~1-2 million years ago between members of the A and D  
80 genome groups (Wendel 1989). Although the most closely related extant species of  
81 these two progenitor diploids are found in southern Africa and Northern Peru,  
82 respectively, the polyploids are only found in the Americas (Figure 1). Most wild  
83 populations, including those of the two independently domesticated species *G. hirsutum*  
84 ( $AD_1$ ) and *G. barbadense* ( $AD_2$ ), occur in small, isolated populations on islands or in  
85 coastal regions. Subsequent to their initial domestication 4,000 - 8,000 years ago in the  
86 Yucatan Peninsula ( $AD_1$ ) and NW S. America ( $AD_2$ ), respectively, the ranges of the two  
87 domesticated species rapidly expanded to encompass much of the American tropics

88 and subtropics and then spread globally with the rise of the international cotton fiber  
89 trade (Yuan et al. 2021).

90 Here we describe the evolutionary trajectory of deleterious mutations in two wild  
91 diploid and six wild allopolyploid cotton species (all descended from a single  
92 allopolyploidization event), with a focus on how allopolyploidization and speciation have  
93 shaped the number and genomic distribution of deleterious mutations. We use two  
94 methods to estimate the strength of selection at the amino acid and nucleotide level and  
95 show support for a nearly century-old hypothesis that polyploids accumulate mutations  
96 faster than their diploid progenitors. We demonstrate that, in agreement with this  
97 hypothesis, polyploidy has the greatest influence on strongly, rather than moderately or  
98 mildly, deleterious mutations. We also find that deleterious mutations accumulate  
99 asymmetrically between the two co-resident subgenomes in the allopolyploid nucleus,  
100 indicating that these masking effects may act unequally between the subgenomes. In  
101 total, our results support theoretical predictions that allopolyploidy can lead to a faster  
102 rate of deleterious mutation accumulation through masking of recessive deleterious  
103 variants, and that the relationship of the rate of deleterious mutation accumulation  
104 between subgenomes and their progenitor diploids is complex, even when comparing  
105 identical pairs of single-copy homoeologs among lineages.

106

## 107 **Results**

### 108 *Patterns of Synonymous and Nonsynonymous Mutations*

109 To investigate patterns of deleterious mutations, we viewed our data at three  
110 phylogenetic depths: SNPs segregating within the global phylogenetic tree (Figure 2A-

111 D), SNPs that emerged since the divergence of each subgenome from its respective  
112 diploid progenitor (Figure 2E-H), and SNPs that are still variable within the polyploids  
113 (Figure 2I-L). Each group is a subset of the previously described group. We restricted  
114 our analyses to a set of 8,884 single-copy, syntenically conserved homoeologous pairs  
115 of genes (17,768 genes in total) that showed no evidence of gene loss, gene copy  
116 variation, tandem duplication, ambiguous read mapping, homoeologous exchange, or  
117 homoeologous gene conversion (See Methods; Supplementary Figure 1). Notably, the  
118 patterns described below are largely reflected in genome-wide patterns as well  
119 (Supplementary Figure 2), indicating that filtering criteria did not bias overall results, and  
120 that, in cotton, homoeologous interactions have minimal effects on subgenome-specific  
121 SNP patterns (Supplementary Figure 1).

122         Using the curated set of 8,884 pairs of homoeologous genes, we found no  
123 evidence for differences in the rate of synonymous mutation accumulation in diploids  
124 versus polyploids at any phylogenetic depth (Figure 2A, 2E), although differences can  
125 be found within the polyploid species (Figure 2I), with *G. mustelinum* (AD<sub>4</sub>, Orange) and  
126 *G. darwinii* (AD<sub>5</sub>, Yellow) having consistently lower rates than the rest of the clade, and  
127 in both subgenomes. When viewing SNPs that have accumulated since the divergence  
128 of the earliest polyploid lineage (Figure 2AI), there is an asymmetry between  
129 subgenomes in the rate of synonymous site changes, with the Dt (“t” denoting  
130 “tetraploid”) subgenome containing a moderately higher number of synonymous  
131 mutations than the At subgenome for all species. This difference potentially indicates a  
132 higher mutation rate or relaxed background selection in genic regions of the Dt  
133 subgenome compared to homoeologous genic regions of the At subgenome, and is

134 consistent with previous analysis finding that genes in the Dt subgenome are evolving  
135 faster than genes in the At subgenome in five allopolyploid cottons (Chen et al. 2020).  
136 In contrast to the relative homogeneity in rates of synonymous substitution  
137 among diploids and polyploids, rates of nonsynonymous mutation accumulation differed  
138 significantly at all phylogenetic depths. Notably, at the deepest phylogenetic depth  
139 (Figure 2B), estimates for the number of derived nonsynonymous mutations in the  
140 diploids *G. herbaceum* (A<sub>1</sub>, Red) and *G. raimondii* (D<sub>5</sub>, Black) did not differ between  
141 subgenomes, indicating that any mapping biases or erroneous SNP calls in these  
142 samples were removed by our SNP filtering criteria. *Gossypium raimondii* (D<sub>5</sub>)  
143 contained more derived nonsynonymous mutations than did *G. herbaceum* (A<sub>1</sub>), and  
144 this lineage-specific difference was reflected in the Dt and At subgenomes as well.  
145 When lineage-specific effects that arose from the long, shared ancestry between the  
146 subgenomes and their progenitor diploids were removed (Figure 2F), a clear distinction  
147 between the rates of nonsynonymous mutations between diploids and their respective  
148 subgenomes in the allopolyploids becomes apparent. In all polyploids, the At  
149 subgenome contained between 25-58% more nonsynonymous mutations than *G.*  
150 *herbaceum* (A<sub>1</sub>, Red), and the Dt subgenome contained 17-36% more than *G. raimondii*  
151 (D<sub>5</sub>, Black). These results demonstrate that even though the rates of synonymous  
152 mutation accumulation did not differ significantly between the diploids and polyploids,  
153 polyploidy significantly increases the rate of nonsynonymous substitution accumulation.  
154 Finally, when restricting our attention to only those mutations that have arisen following  
155 polyploid formation (Figure 2J), the lineage-specific patterns observed for  
156 nonsynonymous mutations were largely identical to the patterns of synonymous

157 mutations. For example, *G. mustelinum*, (AD<sub>4</sub>, Orange) consistently had the lowest  
158 number of derived mutations in both subgenomes. Notably, however, the Hawaiian  
159 Island endemic *G. tomentosum* (AD<sub>3</sub>, Purple) has a higher number of derived  
160 nonsynonymous mutations than expected based on the patterns of synonymous  
161 mutations, potentially reflecting the population bottleneck associated with its origin  
162 following long-distance dispersal to the Hawaiian Islands (see Discussion). In summary,  
163 polyploidy significantly enhances the rate of nonsynonymous mutation accumulation in  
164 all *Gossypium* allopolyploids, and does so asymmetrically across co-resident genomes.

165

#### 166 *Polyploidy Increases Rate of Deleterious Mutation Accumulation*

167 Because the fitness effects of most nonsynonymous mutations can vary widely, from  
168 neutral to lethal, we asked if the elevated rate of nonsynonymous mutations observed in  
169 polyploid *Gossypium* reflects an increase in neutral or nearly-neutral nonsynonymous  
170 mutations, or if instead this elevation is attributable to a greater accumulation of  
171 deleterious mutations. To address this, we used two approaches to estimate whether a  
172 mutation was deleterious: BAD\_Mutations and GERP++. BAD\_Mutations performs a  
173 likelihood ratio test from a gene-specific multi-species alignment to determine if a  
174 mutation at a particular nonsynonymous site is deleterious, while GERP++ uses a  
175 genome-wide multiple sequence alignment (i.e. agnostic to genic regions) to estimate  
176 the degree of conservation at a particular site in the genome (including noncoding and  
177 synonymous sites). Notably, because one of the hallmark long-term processes following  
178 polyploidy is pseudogenization (Wendel 2015), recently pseudogenized sequences may  
179 still display some degree of conservation across the multiple sequence alignment, but



180 may not be inherently deleterious. Therefore, to avoid inflating estimates of deleterious  
181 mutations in polyploids compared to diploids, we used GERP only within the exonic  
182 regions of the 8,884 homoeologs. Additionally, while GERP can score the degree of  
183 deleteriousness of a mutation, BAD\_Mutations can only classify variants into deleterious  
184 or not deleterious. Therefore, the values shown in Figure 2DHL represent the sum of  
185 the allele frequencies of derived deleterious mutations, similar to the values for Figure  
186 2AEI and Figure 2BFJ. For analysis with GERP, we used the GERP load, which  
187 incorporates the deleteriousness of each variant into the score, summing the frequency  
188 of each derived allele multiplied by its GERP score (see (Rodgers-Melnick et al. 2015;  
189 Wang et al. 2017)).

190 As shown in Figure 2, both of the foregoing analyses demonstrate that  
191 deleterious mutations accumulate in polyploids in a manner similar to nonsynonymous  
192 mutations, suggesting that the difference in nonsynonymous sites cannot be wholly  
193 attributed to putatively neutral or nearly-neutral alleles. For example, there is  
194 remarkable consistency in the patterns of deleterious mutations that have accumulated  
195 since the divergence of the diploid from its respective diploid progenitor in both the  
196 count of nonsynonymous substitutions (Figure 2F), the GERP load (Figure 2G), and the  
197 number of deleterious mutations (Figure 2H). In all three columns, the diploids show  
198 fewer accumulated alleles than the polyploids, *G. tomentosum* (AD<sub>3</sub>, Purple) shows the  
199 highest number of all the polyploids, and *G. mustelinum* (AD<sub>4</sub>, Orange) shows the  
200 fewest of all the polyploids.

201 An interesting pattern arises when comparing estimates of the GERP load  
202 (Figure 2G) and number of deleterious mutations (Figure 2H) between diploids and their

203 closely related subgenomes: while the total number of deleterious mutations in the At  
204 subgenomes was 52-99% higher in the polyploids than the diploids (Figure 2H), the  
205 GERP load in the polyploids was only 13-42% higher (Figure 2G). Similar patterns were  
206 found in the Dt subgenome, with 34-66% more deleterious mutations in the polyploids  
207 than the diploid, but only a 9-13% increase in GERP load. This discrepancy could reflect  
208 inherent differences in the types of sequences used and how deleteriousness is  
209 quantified between the two methods, suggesting that the use of multiple analytical tools  
210 for detection of genetic load may yield more nuanced insights than either method on its  
211 own (See Discussion).

212

### 213 *Asymmetries in the Rate of Deleterious Mutation Accumulation*

214 Although deleterious mutations are accumulating faster in polyploids relative to diploids,  
215 it is not obvious whether this increased rate is different from the increased rate of  
216 accumulation of nonsynonymous mutations. To test this, we compared, among ploidy  
217 levels, the total proportion of nonsynonymous mutations that were considered  
218 deleterious by BAD\_Mutations (Figure 3). For SNPs that originated since the  
219 divergence of the A and D diploids (Figure 3A), the proportion of nonsynonymous sites  
220 that are deleterious is roughly 2% higher in polyploids than in diploids, despite the  
221 shared evolutionary history of more than 4 million years between each subgenome and  
222 their respective diploid progenitors. Notably, as similarly shown in Figure 2, the  
223 proportion of nonsynonymous mutations that are inferred to be deleterious in both  
224 diploids is equivalent when mapped to either subgenome, indicating that our filtering

225 criteria did not differentially exclude deleterious or non-deleterious SNPs with respect to  
226 which subgenome the diploid reads were mapped.

227         At shallower phylogenetic depths (Figure 3B), the difference between diploids  
228 and polyploids becomes even clearer, with polyploids exhibiting 3-4% higher  
229 proportions of deleterious SNPs in the Dt subgenome and 5-12% higher in the At  
230 subgenome than their respective diploid progenitors. The most unbiased and  
231 straightforward comparison of the asymmetry in strength of purifying selection between  
232 the two subgenomes of allopolyploid cottons is provided by mutations that have  
233 occurred following polyploidization (Figure 3C). Here, the At subgenome of all species  
234 contain a 2-3% high proportion of deleterious SNPs than the Dt subgenome, indicating  
235 that differences exist in the strength of purifying selection between the two  
236 homoeologous subgenomes that have resided in the same nucleus for over a million  
237 years. This pattern is also observed when deleterious SNPs are mapped onto the  
238 phylogeny (Supplementary Figure 3). Additionally, there is more variation among  
239 species in the At subgenome than in the Dt subgenome, although the patterns in this  
240 respect are not simple. The amount of subgenomic asymmetry is smallest in *G. darwinii*  
241 (AD<sub>5</sub>, Yellow) from the Galapagos Islands, and largest in the Brazilian endemic and  
242 inland species *G. mustelinum* (AD<sub>4</sub>, Orange), indicating that asymmetries between  
243 subgenomes of the same species may vary within a single clade of allopolyploids.

244

#### 245 *Disentangling Demography and Selection from Effects of Ploidy*

246 Demography is a potential confounding factor in estimating the rate of deleterious  
247 mutation accumulation. Shifts in demography are known to complicate inferences of the

248 strength of selection and genetic load (Brandvain and Wright 2016); for example, even  
249 in one of the best studied demographic shifts, the Out of Africa migration in humans,  
250 several papers (Lohmueller et al. 2008; Gazave et al. 2013; Simons et al. 2014; Henn et  
251 al. 2016; Simons and Sella 2016) have reached seemingly contradictory conclusions on  
252 whether genetic load has increased as a result of these shifts in demography (but see  
253 (Lohmueller 2014)). The pattern of deleterious mutation accumulation has also been  
254 well-documented in bottlenecks and population growth associated with domestication in  
255 crops such as maize (Wang et al. 2017), soybean and barley (Kono et al. 2016),  
256 sorghum (Lozano et al. 2021), cassava (Ramu et al. 2017), and rice (Liu et al. 2017).

257         Polyploidy is typically associated with a population bottleneck (Grant 1981;  
258 Barringer 2007), but because the genetic diversity of both the diploid and polyploid  
259 species in this study is low (Table 1), demographic modeling of the depth or duration of  
260 population bottlenecks and range expansion following polyploid formation is not straight-  
261 forward. Generalized patterns of the effects of demography on deleterious mutations,  
262 however, can serve as a null expectation to test if our data follows the same trends  
263 observed under varying demographic scenarios, as explained in the following.

264         Demographic shifts, including population bottlenecks and expansions, have a  
265 large influence on the accumulation of deleterious mutations. According to the nearly  
266 neutral theory (Ohta 1992), the fate of deleterious mutations is determined by genetic  
267 drift instead of selection when the selection coefficient ( $s$ ) of deleterious mutations is  
268 less than or equal to  $1/(2N_e)$ , where  $N_e$  is the effective population size. The reduction of  
269  $N_e$  during a population bottleneck would therefore allow weakly deleterious mutations to  
270 escape purifying selection (i.e. to behave as if they were neutral), while strongly

271 deleterious mutations with a selective coefficient greater than  $1/(2N_e)$  would still be  
272 removed by purifying selection. On the other hand, as  $N_e$  increases during population  
273 expansion, mutations that are mildly deleterious are expected to be more efficiently  
274 purged from the population.

275         In both demographic scenarios, we expect that mildly or moderately deleterious  
276 mutations would be most differentially affected, while strongly deleterious mutations  
277 would consistently be removed by purifying selection. Based on this theory, if the  
278 differences in the number of deleterious mutations we see between diploids and  
279 polyploids are due to demography, then we would expect to see most of that difference  
280 reflected in mildly, rather than strongly, deleterious mutations. In contrast, if masking of  
281 deleterious alleles in polyploids is driving a higher rate of accumulation relative to  
282 diploids, this pattern will not be observed.

283         To test if our data were consistent with changes in demography, we first asked if  
284 there was a correlation between the degree of deleteriousness of a mutation (as  
285 measured by GERP) and its relative increase in the polyploids compared to the diploids.  
286 To answer this question, we plotted the relative change of deleterious mutations in each  
287 subgenome relative to its most closely related diploid progenitor. We plotted this relative  
288 change for three different degrees of deleteriousness - strongly deleterious mutations ( $4$   
289  $< \text{GERP} \leq 6$ ), moderately deleteriousness ( $2 < \text{GERP} \leq 4$ ), and mildly deleteriousness  
290 ( $0 < \text{GERP} \leq 2$ ) deleterious (Figure 4). We found that in both subgenomes of all six  
291 polyploids, when comparing SNPs that had originated after the divergence of the diploid

292 from its respective subgenome in the allopolyploids, strongly deleterious mutations  
293 accumulated at a faster rate relative to diploids than did moderately or mildly deleterious  
294 mutations, which is inconsistent with expectations under a demographic change model  
295 alone. We also observed this change under both an additive and recessive model of  
296 dominance (Supplementary Figure 5). In total, the rate of accumulation among  
297 mutations with different inferred degrees of deleteriousness do not suggest that the  
298 patterns we see can be explained solely by demographic changes, but that the masking  
299 effect of duplicated genes may play an important role in the determining the fate of  
300 deleterious mutations in allopolyploids.

301

## 302 **Discussion**

### 303 *Effects of Polyploidy on Deleterious Mutation Accumulation*

304 One of the earliest hypotheses regarding mutation accumulation in allopolyploids dates  
305 back to Haldane (Haldane 1932) where he posits that in allopolyploids, “one gene may  
306 be altered without disadvantage, provided its functions can be performed by a gene in  
307 one of the other sets of chromosomes.” Allopolyploids are therefore predicted be able to  
308 tolerate a higher mutational load than their diploid relatives, and putatively deleterious  
309 mutations may accumulate faster in polyploids than in their diploid relatives due to the  
310 masking effect of recessive or incompletely dominant deleterious alleles. Here, we  
311 demonstrate that these predictions are true in allopolyploid cottons. All polyploids in  
312 *Gossypium* harbor more mutations at phylogenetically conserved sites than do their  
313 closest diploid progenitors, as determined by two different methods of detecting  
314 deleterious mutations. We also find that the proportion of all nonsynonymous mutations

315 that are inferred to be deleterious is higher in polyploids than in their diploid progenitors  
316 and that polyploidy has the greatest effect on strongly deleterious (and, inferentially,  
317 more recessive (Eyre-Walker and Keightley 2007; Huber et al. 2018)) mutations. Thus,  
318 using the power of comparative phylogenetics and genomics combined with analytical  
319 methods for detection of deleterious mutations, we demonstrate confirmation of a nearly  
320 century old hypothesis regarding natural selection in allopolyploid organisms.

321

### 322 *Demography Alone Cannot Explain Patterns of Deleterious Mutations in Polyploids*

323 Estimating the strength of natural selection and genetic load is notoriously challenging  
324 (Lohmueller 2014) and is complicated by shifts in effective population size (including  
325 bottlenecks and expansions), mating systems, and effective recombination rates,  
326 among other life-history and demographic factors (Brandvain and Wright 2016). Here  
327 we illuminate an additional relevant consideration, i.e., whole genome duplication. Yet  
328 many of the considerations for populations that are not in demographic equilibrium also  
329 apply to *Gossypium*. Diversification in the cotton tribe (*Gossypieae*) has been  
330 characterized by numerous long-distance dispersal events (Grover et al. 2017),  
331 including the one from Africa to the Americas 1-2 MYA that led to the evolution of  
332 allopolyploid *Gossypium*. We note that in the Hawaiian Islands endemic *G.*  
333 *tomentosum*, the total number of synonymous substitutions is not significantly different  
334 from the rest of the polyploids, but the number of nonsynonymous and deleterious  
335 mutations is significantly increased, suggesting that the genetic bottleneck associated  
336 with island dispersal has elevated the number of deleterious mutations compared to the  
337 rest of the polyploids.

338           While demographic changes upon polyploid formation have been shown to  
339 change the number and frequency of deleterious mutations in other systems (Douglas  
340 et al. 2015; Paape et al. 2018; Baduel et al. 2019; Kryvokhyzha, Salcedo, et al. 2019;  
341 Kryvokhyzha, Milesi, et al. 2019), we show here that the patterns of mutation  
342 accumulation in *Gossypium* cannot be explained by demography alone, and that the  
343 data are more consistent with the nearly century-old hypothesis that recessive  
344 deleterious mutations can accumulate faster in allopolyploids due to the masking effect  
345 of duplicated genes and lack of recombination between subgenomes (Haldane 1932).  
346 Specifically, we show that strongly (and, hence, more recessive (Morton et al. 1956;  
347 Mukai et al. 1972; Eyre-Walker and Keightley 2007; Agrawal and Whitlock 2011; Huber  
348 et al. 2018)) deleterious mutations accumulate faster in polyploids compared to diploids  
349 than moderately or mildly deleterious mutations, and that this pattern is inconsistent with  
350 demographic shifts or long-term change in population size (Figure 4, Supplementary  
351 Figure 5).

352

### 353 *Asymmetry in Subgenomes in the Distribution of Deleterious Mutations*

354 One of the elegant attributes of a clade of allopolyploid genomes derived from a single  
355 polyploidization event is that they offer a remarkable natural experiment for comparing  
356 subgenomes that have resided within the same nucleus for, in the case of *Gossypium*,  
357 approximately 1.5 million years. Once an allopolyploid is established, each subgenome  
358 is subjected to identical external or population-level factors, including demography,  
359 mating systems, and environmental and ecological conditions, as well as internal  
360 cellular processes, including identical DNA replication and recombination machinery.



361 These features remove many of the confounding factors that may influence the genetic  
362 load and provide a simple comparative context for revealing evolutionary forces that  
363 might differentially affect co-resident genomes or homoeologs.

364 An unexpected finding of our analyses is the striking asymmetry in the proportion  
365 of all nonsynonymous mutations that are inferred to be deleterious between the two  
366 subgenomes of all allopolyploid species in *Gossypium*. We found that the At  
367 subgenome of all species contains 2-3% more nonsynonymous mutations that are  
368 inferred to be deleterious (Figure 3) even when only considering mutations that have  
369 arisen following the earliest allopolyploid diversification events, and correcting for  
370 removing the biases of unequal phylogenetic distances to each subgenome's model  
371 progenitor diploid. Our work adds to a growing recognition that the two co-resident  
372 subgenomes in cotton allopolyploids may be shaped asymmetrically by evolutionary  
373 processes, including interspecific introgression and selection under domestication  
374 (Fang, Wang, et al. 2017; Fang, Guan, et al. 2017; Chen et al. 2020; Yuan et al. 2021),  
375 and that this phenomenon also extends to other important allopolyploid crop plants,  
376 including wheat (Pont and Salse 2017; Jiao et al. 2018) and *Brassica* (Tong et al. 2020).

377 Teasing apart the genesis of differential subgenomic responses to selection is  
378 rendered challenging by several factors independent of phylogeny. We note, for  
379 example, the relevant example of the recently formed allopolyploid *Capsella bursa-*  
380 *pastoris* and its diploid progenitors, where consistent asymmetries in genetic load are  
381 reported between the subgenomes (Kryvokhyzha, Salcedo, et al. 2019; Kryvokhyzha,  
382 Milesi, et al. 2019) the differences likely reflect the dramatically different mating systems  
383 of the progenitors, in which the subgenome with the higher genetic load originated from

384 an obligate outcrosser, *C. grandiflora* ( $N_e = 800,000$ ), whereas the subgenome with the  
385 lower genetic load derives from the predominantly selfing *C. orientalis* ( $N_e =$   
386 5000)(Douglas et al. 2015). In another recently formed (20-250 thousand years ago)  
387 allopolyploid, *Arabidopsis kamchatica*, no asymmetry in the distribution of fitness effects  
388 between subgenomes was found, although it was observed that each subgenome of the  
389 allopolyploid contained more neutral and fewer deleterious alleles than either of the  
390 diploid progenitors (Paape et al. 2018). It is unclear, however, whether this shift was  
391 due to allopolyploidy *per se* or if it reflects the transition from an obligate outcrossing to  
392 a mating system with some degree of inbreeding, with a concomitant purging of partially  
393 or completely recessive deleterious alleles, as shown in several other systems  
394 (Arunkumar et al. 2015; Roessler et al. 2019). In *Gossypium*, all species have similar  
395 mating systems and a canonical outcrossing floral morphology including highly exerted  
396 styles and stigmas. Population sizes often are small, however, likely leading to relatively  
397 high levels of generalized inbreeding. At present, however, no data exist that address  
398 these considerations.

399

#### 400 *Polyploidy, Redundancy, and Fitness Effects*

401 One possible interpretation of our results is that *Gossypium* polyploids are less fit than  
402 their closely related diploid progenitors because they harbor more deleterious mutations  
403 in their genomes, especially mutations that have already been driven to fixation. We  
404 note that an additional possibility is that mutations in polyploids that occur at  
405 phylogenetically conserved sites may not actually have a deleterious effect on fitness as  
406 they do in diploids. Inferring the genetic load of a population simply by counting the

407 number of deleterious variants assumes that all alleles contribute independently to the  
408 total genetic load of a population. However, because of the functional overlap of  
409 duplicated genes and, in most cases, absence of recombination between  
410 homoeologous chromosomes in an allopolyploid, a recessive deleterious mutation can  
411 never be present in all four copies of a gene and thus may be invisible to selection  
412 because of the masking effect of its homoeologous partner.

413 An important takeaway from this study is that recessive deleterious mutations in  
414 allopolyploids, at least at some loci, may actually accumulate in a manner more similar  
415 to neutral mutations, presumably because of the lack of recombination between  
416 subgenomes and, hence, the inability of purifying selection to “see” the negative effects  
417 of these mutations. Because these recessive deleterious mutations escape the effects  
418 of purifying selection, many traditional tests for detecting selection (e.g.  $dN/dS$ ,  $\pi_N/\pi_S$ )  
419 may be biased when comparing a polyploid to diploid because the polyploid would be  
420 expected to accumulate putatively deleterious sites more quickly (and maintain a higher  
421 genetic diversity at nonsynonymous sites) than their diploid relatives.

422 Another important implication of this finding is that allopolyploidy (or gene  
423 duplication in general) may play an important and underrecognized role in determining  
424 how selection acts on new mutations, notwithstanding the burgeoning literature on fates  
425 of duplicate gene evolution (Conant et al. 2014; Shi et al. 2020; Veitia and Birchler  
426 2021). The evolutionary trajectory of new mutations will largely be dependent on the  
427 selection coefficient ( $s$ ) acting on that locus, and the dominance coefficient ( $h$ ), defined  
428 as the proportion of the fitness cost that a mutation harbors when in a heterozygous  
429 state. In allopolyploids, however, the evolutionary fate of new mutations may be

430 determined not only by allelic dominance at that locus, but also by the interaction arising  
431 from the coexistence of its homoeologous locus, a term we call “homoeologous epistatic  
432 dominance”. The relationships between this homoeologous epistatic dominance, allelic  
433 dominance, and the selection coefficient are likely complicated and potentially heavily  
434 influenced by other biological considerations such as biased expression of homoeologs,  
435 sub- or neofunctionalization, and homoeologous recombination, among others.  
436 Moreover, notwithstanding these polyploidy-specific effects, even the genome-wide  
437 relationships between two of these factors, allelic dominance and the selection  
438 coefficient, have only been modeled using genomic data in the past few years (Huber et  
439 al. 2018).

440         Nonetheless, understanding how this homoeologous epistatic dominance  
441 impacts the fitness effects of new mutations is an unexplored aspect of polyploid  
442 genome evolution, and it is not yet clear whether this will equally affect advantageous  
443 and deleterious variants. How homoeologous epistatic dominance operates with respect  
444 to functional properties arising from considerations such as gene balance (Veitia and  
445 Birchler 2021), dosage effects (Conant et al. 2014), structural and functional  
446 entanglement (Kuzmin et al. 2020; Kuzmin et al. 2021), and inter-subgenomic *cis- and*  
447 *trans-* effects (Bottani et al. 2018; Hu and Wendel 2019) would seem to represent  
448 important avenues for understanding how natural selection operates differently in  
449 polyploids compared to diploids. From an applied perspective, these insights could be  
450 important in agriculture, particularly because so many of our most important crop plants  
451 have a recent history that includes polyploidy (Renny-Byfield and Wendel 2014), and

452 segregating patterns of genome fractionation have the potential to serve as targets of  
453 selection in crop improvement (Hufford et al. 2021).

454

## 455 **Materials and Methods**

### 456 *Plant Materials and Sequencing*

457 We used whole genome sequencing data from 46 individuals in *Gossypium*, including  
458 between two and ten individuals from each of eight species. Included in our sampling  
459 was six polyploid species originating from a single polyploidization event 1-2 million  
460 years ago (Wendel 1989; Hu et al. 2021), two diploid species representing models of  
461 the genome donors to the allopolyploids (A and D), and three species from Australia  
462 that served as outgroups for polarizing SNPs into ancestral and derived states. These  
463 sequences were previously described (Yuan et al. 2021), and SRA codes for all 46  
464 resequenced individuals are listed in Supplemental Table 1. For *G. hirsutum*, we  
465 randomly chose ten accessions that were classified in the “Wild” population from Yuan  
466 et al. (Yuan et al. 2021), and for the other species, we chose all accessions available  
467 that did not show evidence of being mislabeled, as determined by a PCA plot of the  
468 SNPs called.

469       After the data were downloaded from NCBI, adapter sequence removal and  
470 quality score filtering of FASTQ reads was performed using Trimmomatic v0.36 (Bolger  
471 et al. 2014) using the parameters “LEADING:28 TRAILING:28 SLIDINGWINDOW:8:28  
472 SLIDINGWINDOW:1:10 MINLEN:65 TOPHRED33”. Trimmed reads from each polyploid  
473 sample were mapped to the 26 chromosomes of the *G. hirsutum* reference genome  
474 (Saski et al. 2017), and reads from each diploid sample were mapped to each

475 subgenome separately to avoid competitive mapping of the diploid reads against a  
476 tetraploid reference genome. Reads from the three outgroup species were separately  
477 mapped to both subgenomes to ensure that reads were not filtered out for mapping to  
478 multiple parts of the genome. All mapping was done using bwa-mem v0.7.17 (Li and  
479 Durbin 2009) and only uniquely mapping paired reads (-F 260 flag) that were mapped in  
480 their proper orientation (-f 2 flag) were retained using Samtools v1.9 (Li et al. 2009)  
481 before the files were sorted and converted to bam files. Using the Sentieon (Kendig et  
482 al. 2019) SNP Calling program, gVCF files were generated, and joint genotyping was  
483 performed using the GVCFTyper algorithm (see Github repository for full scripts). SNP  
484 filtering was performed using GATK v4.0.4.0 using the filter expression "QD < 2.0 || FS  
485 > 60.0 || MQ < 40.0 || SOR > 4.0 || MQRankSum < -12.5 || ReadPosRankSum < -8.0".  
486 For each species (excluding the outgroup species, and treating *G. stephensii*, and *G.*  
487 *ekmanianum* as a single species), we nullified any SNP call in which all individuals were  
488 heterozygous to remove any collapsed genomic region in the reference genome or  
489 paralogous regions that were not present in the reference genome. We treated *G.*  
490 *stephensii* and *G. ekmanianum* as a single species because we only sampled two  
491 individuals of *G. stephensii*, so removing any sites in which both individuals were  
492 heterozygous errantly removed real SNPs that were not due to paralogy mapping  
493 issues. All scripts for generating and filtering SNP calls are located on our GitHub  
494 repository (<https://github.com/conJUSTover/Deleterious-Mutations-Polyploidy>).

495

496 *Identification of Homoeologs*

497 We used the pSONIC pipeline (Conover et al. 2021) to identify syntenically conserved  
498 homoeologs in the *G. hirsutum* reference genome, and kept only homoeologous pairs  
499 that were less than 5% different in their total annotated CDS length. To remove  
500 homoeologous pairs that may have experienced homoeologous exchange events  
501 (though there is scant evidence for this (Salmon et al. 2010; Flagel et al. 2012; Chen et  
502 al. 2020)), we removed any pair in which the proportion of the reads from the two  
503 progenitor diploid genomes (termed At and Dt in the allopolyploid, the “t” indicating  
504 “tetraploid”) did not meet the expected 2:2 ratio. Average read depth of CDS regions  
505 was determined by bedtools2 v.2.27.1 (Quinlan and Hall 2010). Briefly, for a single  
506 homoeologous pair, we calculated the average read depth of the At homoeolog divided  
507 by the sum of the average read depth of both homoeologs and removed any  
508 homoeologous pair in which this fraction was less than 37.5 or greater than 62.5. We  
509 expect any HEs that result in a 0:4 At:Dt copy number to contain 0% At reads/total  
510 reads; HEs that result in 1:3 At:Dt copy number should have a 25% At reads/total reads;  
511 HEs that result in a 3:1 At:Dt copy number should have a 75% At reads/total reads; HEs  
512 that result in a 4:0 At:Dt copy number should have a 100% At reads/total reads; and no  
513 HE (i.e. 2:2 At:Dt copy number) would result in a 50% At reads/total reads. We used the  
514 midpoints between the “No HE” and the 1:3 and 3:1 copy numbers as cutoff points. This  
515 filtering resulted in 8,884 homoeologous pairs (17,768 genes) being analyzed further.

516 Non-reciprocal homoeologous exchanges (i.e. homoeologous gene conversion)  
517 could also bias the estimates of the genetic load in a way that is not related to new  
518 mutation following polyploidization or speciation. To control for positions in these non-  
519 HE homoeologs that may be influenced by gene conversion, we linked SNP positions

520 between homoeologs in the following way. We first performed pairwise alignments of  
521 the CDS sequences using MACSEv2 (Ranwez et al. 2011; Ranwez et al. 2018), which  
522 aligns CDS sequences in accordance with their translated amino acid sequences, but  
523 allows for the possibility of frameshift mutations. We then used the aligned CDS  
524 sequences to identify where indels were present, and found the corresponding genomic  
525 positions for every nucleotide in the alignment, inserting gaps where indels occurred.  
526 We then extracted the genomic positions for each SNP position as well as the genomic  
527 position for its aligned nucleotide. We retained only those homoeologous SNP positions  
528 in which both positions had a confidently called ancestral allele (described above) and  
529 in which the ancestral allele matched between the two homoeologs. Importantly, for  
530 homoeologs that were encoded in opposite orientations in the reference genome (i.e.  
531 one homoeolog was encoded on the forward strand of the reference genome, and the  
532 other homoeolog was encoded on the reverse complement), we ensured that the  
533 inferred ancestral states for the two SNP positions included both nucleotides of a  
534 purine/pyrimidine pair (e.g. the ancestral state for homoeologous SNP was “A” while the  
535 ancestral state of the other homoeologous SNP was “T”). We also removed any pair of  
536 homoeologous SNPs in which more than 2 alleles were present (while similarly treating  
537 homoeologous pairs encoded in opposite directions as described in the previous  
538 sentence).

539 In total, we only used those SNP sites that: (A) did not link to an indel in its  
540 homoeologous pair, (B) were biallelic and had consistently inferred ancestral states in  
541 the two subgenomes, (C) the derived allele was found in only one of the two



542 subgenomes or their respective diploid progenitors, and (D) the derived allele was fixed  
543 in a diploid and segregating in its respective subgenome (or vice-versa).

544

#### 545 *Quantifying Deleterious Mutations*

546 We used GERP++ (Davydov et al. 2010) to identify regions of the genome that are  
547 evolutionarily conserved, using whole genome alignments from 11 genomes spanning  
548 the Eudicots (Supplementary Table 2). Species were chosen if they contained  
549 chromosome-level assemblies publicly available on Phytozome or NCBI, and if all  
550 documented whole genome duplication events in each species' evolutionary history is  
551 also shared by *Gossypium* (e.g. the *Arabidopsis thaliana* genome was not chosen  
552 because it has experienced at least one independent WGD event since its divergence  
553 from *Gossypium*). Genomes were aligned to the *G. hirsutum* reference genome using  
554 the LASTZ/MULTIZ approach used by the UCSC genome browser. Briefly, genomes  
555 were masked using Repeatmasker using a custom repeat library enriched with  
556 *Gossypium* TEs (Grover et al. 2017). Each query genome was aligned to each of the *G.*  
557 *hirsutum* reference chromosomes separately. These alignments were chained together  
558 using axtChain, and the best alignment was found using ChainNet. These alignment  
559 files were converted into fasta files using the roast program from the MULTIZ package.

560       Using these genome alignments, we used the gerp++ package (Davydov et al.  
561 2010) to calculate GERP scores for every position in the genome. First, we used 4-fold  
562 degenerate sites in all genomes to calculate a neutral-rate evolutionary tree, which was  
563 calculated using RAxML (Stamatakis 2014). We then used the gerp++ package to  
564 estimate the GERP score at every position in the genome, but importantly, we excluded

565 the *G. hirsutum* reference genome from the alignment to avoid biasing sites in the  
566 reference genome that may be deleterious. Because the gerp++ program ignores gaps  
567 in the reference genome, we used custom R scripts to enter dummy variables in the  
568 gapped regions of the GERP score so the number of GERP scores equaled the total  
569 number of nucleotide positions in each chromosome. Scripts for each step above are  
570 available on Github (link here). To calculate the genetic load across linked sites, we  
571 used the GERP load (i.e. the sum of the derived allele frequency times the GERP score  
572 for each SNP site) as described in (Wang et al. 2017) and (Rodgers-Melnick et al.  
573 2015). All scripts for generating the multiple sequence alignments and GERP scores  
574 can found in our GitHub repository ([https://github.com/conJUSTover/Deleterious-](https://github.com/conJUSTover/Deleterious-Mutations-Polyploidy)  
575 [Mutations-Polyploidy](https://github.com/conJUSTover/Deleterious-Mutations-Polyploidy))

576 Secondly, we used the BAD\_Mutations (Kono et al. 2016; Kono et al. 2018)  
577 pipeline to perform LRT tests on conserved amino acid substitutions sites.  
578 Nonsynonymous substitutions were identified using SNPEff (Cingolani et al. 2012) and  
579 statistical significance was determined using a Bonferroni correction with 967,155  
580 missense mutations to correct for multiple testing. Every step of the BAD\_Mutations  
581 pipeline was performed using the dev branch of the github repository (accessed July 13,  
582 2020). Species included in the calculation of deleterious mutations are included in  
583 Supplementary Table 3, with the notable absence of *Gossypium raimondii* since it was  
584 sampled as part of this project.

585 We used the GERP load (sum of the allele frequencies \* GERP score) (Wang et  
586 al. 2017) and the BAD\_Mutations load (sum of the allele frequencies of all statistically  
587 significant deleterious mutations) as a summary of the genetic load present in each

588 genome at different phylogenetic depths. The BAD\_Mutations load may be interpreted  
589 as the average number of deleterious alleles expected in each individual of a  
590 population, but it does not differentiate between severity of deleteriousness (as does  
591 GERP load). We also used GERP to classify SNPs into mildly deleterious ( $0 < \text{GERP} \leq 2$ ),  
592 moderately deleterious ( $2 < \text{GERP} \leq 4$ ), and strongly deleterious ( $4 < \text{GERP} \leq 6$ ). Scripts for  
593 generating the whole-genome alignments for GERP are located on our GitHub  
594 repository (<https://github.com/conJUSTover/Deleterious-Mutations-Polyploidy>).

595

#### 596 *Rate of Deleterious Mutations Along the Phylogeny of Gossypium*

597 To determine if there was a bias in the rate of deleterious mutation accumulation  
598 between the two subgenomes, we used homoeologous SNPs in which the derived allele  
599 showed a parsimony-informative position between the two subgenomes of  
600 allopolyploids and the two diploid progenitors (identified by the green bars in  
601 Supplemental Figure 1).

602

#### 603 *Genetic Diversity*

604 For each species,  $\pi$  for the 17,768 high quality gene CDS sequences (8,884  
605 homoeologous pairs) was calculated on a site-wise basis using vcfTools (Danecek et al.  
606 2011). To find the total PI across all genes, we summed the total sitewise pi values and

607 divided by the total length of the concatenated CDS sequences, removing any positions  
608 which did not have a null SNP call in the VCF file.

609

## 610 **Acknowledgements**

611 The authors thank the Iowa State University ResearchIT Unit for computational support.

612 The authors also thank Guanjing Hu for her assistance in designing Figure 1, and

613 Matthew Hufford for his helpful comments and discussions on the manuscript. This work

614 was supported by funding from the National Science Foundation-Plant Genome

615 Research Program (awarded to JFW) and Cotton Inc. (awarded to JFW and JLC).

## 616 **References**

- 617 Agrawal AF, Whitlock MC. 2011. Inferences about the distribution of dominance drawn  
618 from yeast gene knockout data. *Genetics* 187:553–566.
- 619 Arunkumar R, Ness RW, Wright SI, Barrett SCH. 2015. The evolution of selfing is  
620 accompanied by reduced efficacy of selection and purging of deleterious mutations.  
621 *Genetics* 199:817–829.
- 622 Baduel P, Quadrana L, Hunter B, Bomblies K, Colot V. 2019. Relaxed purifying  
623 selection in autopolyploids drives transposable element over-accumulation which  
624 provides variants for local adaptation. *Nat. Commun.* 10:5818.
- 625 Barringer BC. 2007. Polyploidy and self-fertilization in flowering plants. *Am. J. Bot.*  
626 94:1527–1533.
- 627 Bever JD, Felber F. 1992. The theoretical population genetics of autopolyploidy. *Oxford*  
628 *surveys in evolutionary biology* 8:185–185.
- 629 Bolger AM, Lohse M, Usadel B. 2014. Trimmomatic: a flexible trimmer for Illumina  
630 sequence data. *Bioinformatics* 30:2114–2120.
- 631 Bomblies K. 2020. When everything changes at once: Finding a new normal after  
632 genome duplication. *Proc. Biol. Sci.* 287:20202154.
- 633 Bottani S, Zabet NR, Wendel JF, Veitia RA. 2018. Gene Expression Dominance in  
634 Allopolyploids: Hypotheses and Models. *Trends Plant Sci.* 23:393–402.
- 635 Brandvain Y, Wright SI. 2016. The Limits of Natural Selection in a Nonequilibrium  
636 World. *Trends Genet.* 32:201–210.
- 637 Chen ZJ, Sreedasyam A, Ando A, Song Q, De Santiago LM, Hulse-Kemp AM, Ding M,  
638 Ye W, Kirkbride RC, Jenkins J, et al. 2020. Genomic diversifications of five  
639 *Gossypium* allopolyploid species and their impact on cotton improvement. *Nat.*  
640 *Genet.* [Internet]. Available from: <http://dx.doi.org/10.1038/s41588-020-0614-5>
- 641 Cingolani P, Platts A, Wang LL, Coon M, Nguyen T, Wang L, Land SJ, Lu X, Ruden  
642 DM. 2012. A program for annotating and predicting the effects of single nucleotide  
643 polymorphisms, SnpEff: SNPs in the genome of *Drosophila melanogaster* strain  
644 w1118; iso-2; iso-3. *Fly* 6:80–92.
- 645 Conant GC, Birchler JA, Pires JC. 2014. Dosage, duplication, and diploidization:  
646 clarifying the interplay of multiple models for duplicate gene evolution over time.  
647 *Curr. Opin. Plant Biol.* 19:91–98.
- 648 Conover JL, Sharbrough J, Wendel JF. 2021. pSONIC: Ploidy-aware Syntenic  
649 Orthologous Networks Identified via Collinearity. *G3* [Internet]. Available from:

- 650 <http://dx.doi.org/10.1093/g3journal/jkab170>
- 651 Danecek P, Auton A, Abecasis G, Albers CA, Banks E, DePristo MA, Handsaker RE,  
652 Lunter G, Marth GT, Sherry ST, et al. 2011. The variant call format and VCFtools.  
653 *Bioinformatics* 27:2156–2158.
- 654 Davydov EV, Goode DL, Sirota M, Cooper GM, Sidow A, Batzoglou S. 2010. Identifying  
655 a high fraction of the human genome to be under selective constraint using  
656 GERP++. *PLoS Comput. Biol.* 6:e1001025.
- 657 Douglas GM, Gos G, Steige KA, Salcedo A, Holm K, Josephs EB, Arunkumar R, Ågren  
658 JA, Hazzouri KM, Wang W, et al. 2015. Hybrid origins and the earliest stages of  
659 diploidization in the highly successful recent polyploid *Capsella bursa-pastoris*.  
660 *Proc. Natl. Acad. Sci. U. S. A.* 112:2806–2811.
- 661 Doyle JJ, Coate JE. 2019. Polyploidy, the nucleotype, and novelty: The impact of  
662 genome doubling on the biology of the cell. *Int. J. Plant Sci.* 180:1–52.
- 663 Eyre-Walker A, Keightley PD. 2007. The distribution of fitness effects of new mutations.  
664 *Nat. Rev. Genet.* 8:610–618.
- 665 Fang L, Guan X, Zhang T. 2017. Asymmetric evolution and domestication in  
666 allotetraploid cotton (*Gossypium hirsutum* L.). *The Crop Journal* 5:159–165.
- 667 Fang L, Wang Q, Hu Y, Jia Y, Chen J, Liu B, Zhang Z, Guan X, Chen S, Zhou B, et al.  
668 2017. Genomic analyses in cotton identify signatures of selection and loci  
669 associated with fiber quality and yield traits. *Nat. Genet.* 49:1089–1098.
- 670 Fernandes Gyorfy M, Miller ER, Conover JL, Grover CE, Wendel JF, Sloan DB,  
671 Sharbrough J. 2021. Nuclear-cytoplasmic balance: whole genome duplications  
672 induce elevated organellar genome copy number. *Plant J.* [Internet]. Available from:  
673 <http://dx.doi.org/10.1111/tpj.15436>
- 674 Flagel LE, Wendel JF, Udall JA. 2012. Duplicate gene evolution, homoeologous  
675 recombination, and transcriptome characterization in allopolyploid cotton. *BMC*  
676 *Genomics* 13:302.
- 677 Gazave E, Chang D, Clark AG, Keinan A. 2013. Population growth inflates the per-  
678 individual number of deleterious mutations and reduces their mean effect. *Genetics*  
679 195:969–978.
- 680 Grant V. 1981. Plant Speciation. In: Plant Speciation. Columbia University Press.
- 681 Grover CE, Arick MA 2nd, Conover JL, Thrash A, Hu G, Sanders WS, Hsu C-Y, Naqvi  
682 RZ, Farooq M, Li X, et al. 2017. Comparative Genomics of an Unusual  
683 Biogeographic Disjunction in the Cotton Tribe (Gossypieae) Yields Insights into  
684 Genome Downsizing. *Genome Biol. Evol.* 9:3328–3344.

- 685 Grover CE, Grupp KK, Wanzek RJ, Wendel JF. 2012. Assessing the monophyly of  
686 polyploid *Gossypium* species. *Plant Syst. Evol.* 298:1177–1183.
- 687 Haldane JBS. 1932. *The Causes of Evolution*. 55 Fifth Avenue, New York : Longmans,  
688 Green and Co.
- 689 Henn BM, Botigué LR, Peischl S, Dupanloup I, Lipatov M, Maples BK, Martin AR,  
690 Musharoff S, Cann H, Snyder MP, et al. 2016. Distance from sub-Saharan Africa  
691 predicts mutational load in diverse human genomes. *Proc. Natl. Acad. Sci. U. S. A.*  
692 113:E440–E449.
- 693 Hill RR Jr. 1970. Selection in autotetraploids. *Theor. Appl. Genet.* 41:181–186.
- 694 Huber CD, Durvasula A, Hancock AM, Lohmueller KE. 2018. Gene expression drives  
695 the evolution of dominance. *Nat. Commun.* 9:2750.
- 696 Hufford MB, Seetharam AS, Woodhouse MR, Chougule KM, Ou S, Liu J, Ricci WA,  
697 Guo T, Olson A, Qiu Y, et al. 2021. De novo assembly, annotation, and  
698 comparative analysis of 26 diverse maize genomes. *Science* 373:655–662.
- 699 Hu G, Grover CE, Yuan D, Dong Y, Miller E, Conover JL, Wendel JF. 2021. Evolution  
700 and Diversity of the Cotton Genome. In: Rahman M-U-, Zafar Y, Zhang T, editors.  
701 *Cotton Precision Breeding*. Cham: Springer International Publishing. p. 25–78.
- 702 Hu G, Wendel JF. 2019. Cis-trans controls and regulatory novelty accompanying  
703 allopolyploidization. *New Phytol.* 221:1691–1700.
- 704 Jiao W, Yuan J, Jiang S, Liu Y, Wang L, Liu M, Zheng D, Ye W, Wang X, Chen ZJ.  
705 2018. Asymmetrical changes of gene expression, small RNAs and chromatin in two  
706 resynthesized wheat allotetraploids. *Plant J.* 93:828–842.
- 707 Jiao Y, Wickett NJ, Ayyampalayam S, Chanderbali AS, Landherr L, Ralph PE, Tomsho  
708 LP, Hu Y, Liang H, Soltis PS, et al. 2011. Ancestral polyploidy in seed plants and  
709 angiosperms. *Nature* 473:97–100.
- 710 Kendig KI, Baheti S, Bockol MA, Drucker TM, Hart SN, Heldenbrand JR, Hernaez M,  
711 Hudson ME, Kalmbach MT, Klee EW, et al. 2019. Sentieon DNaseq variant calling  
712 workflow demonstrates strong computational performance and accuracy. *Front.*  
713 *Genet.* 10:736.
- 714 Kono TJY, Fu F, Mohammadi M, Hoffman PJ, Liu C, Stupar RM, Smith KP, Tiffin P, Fay  
715 JC, Morrell PL. 2016. The role of deleterious substitutions in crop genomes. *Mol.*  
716 *Biol. Evol.* 33:2307–2317.
- 717 Kono TJY, Lei L, Shih C-H, Hoffman PJ, Morrell PL, Fay JC. 2018. Comparative  
718 genomics approaches accurately predict deleterious variants in plants. *G3* 8:3321–  
719 3329.



- 720 Kryvokhyzha D, Milesi P, Duan T, Orsucci M, Wright SI, Glémin S, Lascoux M. 2019.  
721 Towards the new normal: Transcriptomic convergence and genomic legacy of the  
722 two subgenomes of an allopolyploid weed (*Capsella bursa-pastoris*). *PLoS Genet.*  
723 15:e1008131.
- 724 Kryvokhyzha D, Salcedo A, Eriksson MC, Duan T, Tawari N, Chen J, Guerrina M,  
725 Kreiner JM, Kent TV, Lagercrantz U, et al. 2019. Parental legacy, demography, and  
726 admixture influenced the evolution of the two subgenomes of the tetraploid  
727 *Capsella bursa-pastoris* (Brassicaceae). *PLoS Genet.* 15:e1007949.
- 728 Kuzmin E, Taylor JS, Boone C. 2021. Retention of duplicated genes in evolution.  
729 *Trends Genet.* [Internet]. Available from:  
730 <https://www.sciencedirect.com/science/article/pii/S0168952521001864>
- 731 Kuzmin E, VanderSluis B, Nguyen Ba AN, Wang W, Koch EN, Usaj M, Khmelinskii A,  
732 Usaj MM, van Leeuwen J, Kraus O, et al. 2020. Exploring whole-genome duplicate  
733 gene retention with complex genetic interaction analysis. *Science* [Internet] 368.  
734 Available from: <http://dx.doi.org/10.1126/science.aaz5667>
- 735 Li H, Durbin R. 2009. Fast and accurate short read alignment with Burrows-Wheeler  
736 transform. *Bioinformatics* 25:1754–1760.
- 737 Li H, Handsaker B, Wysoker A, Fennell T, Ruan J, Homer N, Marth G, Abecasis G,  
738 Durbin R, 1000 Genome Project Data Processing Subgroup. 2009. The Sequence  
739 Alignment/Map format and SAMtools. *Bioinformatics* 25:2078–2079.
- 740 Liu Q, Zhou Y, Morrell PL, Gaut BS. 2017. Deleterious Variants in Asian Rice and the  
741 Potential Cost of Domestication. *Mol. Biol. Evol.* 34:908–924.
- 742 Lohmueller KE. 2014. The distribution of deleterious genetic variation in human  
743 populations. *Curr. Opin. Genet. Dev.* 29:139–146.
- 744 Lohmueller KE, Indap AR, Schmidt S, Boyko AR, Hernandez RD, Hubisz MJ, Sninsky  
745 JJ, White TJ, Sunyaev SR, Nielsen R, et al. 2008. Proportionally more deleterious  
746 genetic variation in European than in African populations. *Nature* 451:994–997.
- 747 Lozano R, Gazave E, dos Santos JPR, Stetter MG, Valluru R, Bandillo N, Fernandes  
748 SB, Brown PJ, Shakoob N, Mockler TC, et al. 2021. Comparative evolutionary  
749 genetics of deleterious load in sorghum and maize. *Nature Plants* 7:17–24.
- 750 Mason AS, Wendel JF. 2020. Homoeologous Exchanges, Segmental Allopolyploidy,  
751 and Polyploid Genome Evolution. *Front. Genet.* 11:1014.
- 752 Matsumoto T, Wakefield L, Peters A, Peto M, Spellman P, Grompe M. 2021.  
753 Proliferative polyploid cells give rise to tumors via ploidy reduction. *Nat. Commun.*  
754 12:646.
- 755 Monnahan P, Kolář F, Baduel P, Sailer C, Koch J, Horvath R, Laenen B, Schmickl R,



- 756 Paajanen P, Šrámková G, et al. 2019. Pervasive population genomic  
757 consequences of genome duplication in *Arabidopsis arenosa*. *Nat Ecol Evol* 3:457–  
758 468.
- 759 Morton NE, Crow JF, Muller HJ. 1956. AN ESTIMATE OF THE MUTATIONAL  
760 DAMAGE IN MAN FROM DATA ON CONSANGUINEOUS MARRIAGES. *Proc.*  
761 *Natl. Acad. Sci. U. S. A.* 42:855–863.
- 762 Mukai T, Chigusa SI, Mettler LE, Crow JF. 1972. Mutation rate and dominance of genes  
763 affecting viability in *Drosophila melanogaster*. *Genetics* 72:335–355.
- 764 Ohta T. 1992. The Nearly Neutral Theory of Molecular Evolution. *Annu. Rev. Ecol. Syst.*  
765 23:263–286.
- 766 One Thousand Plant Transcriptomes Initiative. 2019. One thousand plant  
767 transcriptomes and the phylogenomics of green plants. *Nature* 574:679–685.
- 768 Paape T, Briskine RV, Halstead-Nussloch G, Lischer HEL, Shimizu-Inatsugi R,  
769 Hatakeyama M, Tanaka K, Nishiyama T, Sabirov R, Sese J, et al. 2018. Patterns of  
770 polymorphism and selection in the subgenomes of the allopolyploid *Arabidopsis*  
771 *kamchatica*. *Nat. Commun.* 9:1–13.
- 772 Pont C, Salse J. 2017. Wheat paleohistory created asymmetrical genomic evolution.  
773 *Curr. Opin. Plant Biol.* 36:29–37.
- 774 Qi X, An H, Hall TE, Di C, Blischak PD, McKibben MTW, Hao Y, Conant GC, Pires JC,  
775 Barker MS. 2021. Genes derived from ancient polyploidy have higher genetic  
776 diversity and are associated with domestication in *Brassica rapa*. *New Phytol.*  
777 230:372–386.
- 778 Quinlan AR, Hall IM. 2010. BEDTools: a flexible suite of utilities for comparing genomic  
779 features. *Bioinformatics* 26:841–842.
- 780 Ramu P, Esuma W, Kawuki R, Rabbi IY, Egesi C, Bredeson JV, Bart RS, Verma J,  
781 Buckler ES, Lu F. 2017. Cassava haplotype map highlights fixation of deleterious  
782 mutations during clonal propagation. *Nat. Genet.* 49:959–963.
- 783 Ranwez V, Douzery EJP, Cambon C, Chantret N, Delsuc F. 2018. MACSE v2: Toolkit  
784 for the Alignment of Coding Sequences Accounting for Frameshifts and Stop  
785 Codons. *Mol. Biol. Evol.* 35:2582–2584.
- 786 Ranwez V, Harispe S, Delsuc F, Douzery EJP. 2011. MACSE: Multiple Alignment of  
787 Coding SEquences accounting for frameshifts and stop codons. *PLoS One*  
788 6:e22594.
- 789 Renny-Byfield S, Wendel JF. 2014. Doubling down on genomes: Polyploidy and crop  
790 plants. *Am. J. Bot.* 101:1711–1725.

- 791 Rodgers-Melnick E, Bradbury PJ, Elshire RJ, Glaubitz JC, Acharya CB, Mitchell SE, Li  
792 C, Li Y, Buckler ES. 2015. Recombination in diverse maize is stable, predictable,  
793 and associated with genetic load. *Proc. Natl. Acad. Sci. U. S. A.* 112:3823–3828.
- 794 Roessler K, Muyle A, Diez CM, Gaut GRJ, Bousios A, Stitzer MC, Seymour DK,  
795 Doebley JF, Liu Q, Gaut BS. 2019. The genome-wide dynamics of purging during  
796 selfing in maize. *Nat Plants* 5:980–990.
- 797 Salmon A, Flagel L, Ying B, Udall JA, Wendel JF. 2010. Homoeologous nonreciprocal  
798 recombination in polyploid cotton. *New Phytol.* 186:123–134.
- 799 Saski CA, Scheffler BE, Hulse-Kemp AM, Liu B, Song Q, Ando A, Stelly DM, Scheffler  
800 JA, Grimwood J, Jones DC, et al. 2017. Sub genome anchored physical  
801 frameworks of the allotetraploid Upland cotton (*Gossypium hirsutum* L.) genome,  
802 and an approach toward reference-grade assemblies of polyploids. *Sci. Rep.*  
803 7:15274.
- 804 Shi X, Chen C, Yang H, Hou J, Ji T, Cheng J, Veitia RA, Birchler JA. 2020. The Gene  
805 Balance Hypothesis: Epigenetics and Dosage Effects in Plants. In: Spillane C,  
806 McKeown P, editors. *Plant Epigenetics and Epigenomics : Methods and Protocols.*  
807 New York, NY: Springer US. p. 161–171.
- 808 Simons YB, Sella G. 2016. The impact of recent population history on the deleterious  
809 mutation load in humans and close evolutionary relatives. *Curr. Opin. Genet. Dev.*  
810 41:150–158.
- 811 Simons YB, Turchin MC, Pritchard JK, Sella G. 2014. The deleterious mutation load is  
812 insensitive to recent population history. *Nat. Genet.* 46:220–224.
- 813 Stamatakis A. 2014. RAxML version 8: a tool for phylogenetic analysis and post-  
814 analysis of large phylogenies. *Bioinformatics* 30:1312–1313.
- 815 Tong C, Kole C, Liu L, Cheng X, Huang J, Liu S. 2020. The Asymmetrical Evolution of  
816 the Mesopolyploid Brassica oleracea Genome. *The Brassica Oleracea Genome*:67.
- 817 Veitia RA, Birchler JA. 2021. Gene-dosage issues: a recurrent theme in whole genome  
818 duplication events. *Trends Genet.* [Internet]. Available from:  
819 <http://dx.doi.org/10.1016/j.tig.2021.06.006>
- 820 Wang L, Beissinger TM, Lorant A, Ross-Ibarra C, Ross-Ibarra J, Hufford MB. 2017. The  
821 interplay of demography and selection during maize domestication and expansion.  
822 *Genome Biol.* 18:215.
- 823 Wendel JF. 1989. New World tetraploid cottons contain Old World cytoplasm. *Proc.*  
824 *Natl. Acad. Sci. U. S. A.* 86:4132–4136.
- 825 Wendel JF. 2015. The wondrous cycles of polyploidy in plants. *Am. J. Bot.* 102:1753–  
826 1756.

- 827 Wendel JF, Grover CE. 2015. Taxonomy and Evolution of the Cotton Genus,  
828 Gossypium. In: Cotton. Agronomy Monograph. Madison, WI: American Society of  
829 Agronomy, Inc., Crop Science Society of America, Inc., and Soil Science Society of  
830 America, Inc. p. 25–44.
- 831 Yuan D, Grover CE, Hu G, Pan M, Miller ER, Conover JL, Hunt SP, Udall JA, Wendel  
832 JF. 2021. Parallel and intertwining threads of domestication in allopolyploid cotton.  
833 *Adv. Sci.*:2003634.
- 834

835 **Figure and Table Legends:**

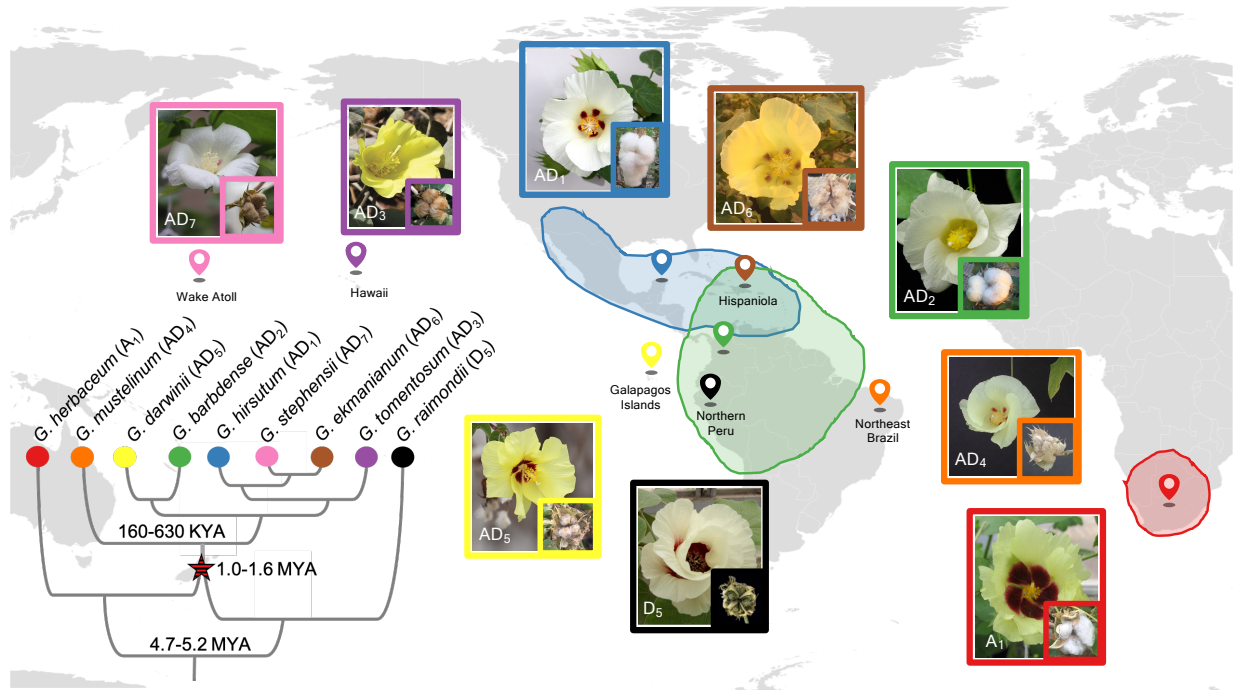

836

837 **Figure 1: Phylogeny and Biogeography of *Gossypium* Allopolyploids and**  
838 **Progenitor Diploids**

839 Diploid *Gossypium* species are classified into eight diploid genome groups. The A  
840 (represented by *G. herbaceum*) and D (represented by *G. raimondii*) genome groups  
841 diverged approximately 5 million years ago (MYA), with ranges in different hemispheres.  
842 Allopolyploids formed *circa* 1-1.6 MYA following transoceanic dispersal of an A genome  
843 ancestor (modeled by *G. herbaceum* (A<sub>1</sub>)) to the Americas and hybridization with a  
844 native D genome species (modeled by *G. raimondii* (D<sub>5</sub>)). Subsequent diversification of  
845 the new allopolyploid (AD genome) lineage led to the evolution of seven currently  
846 recognized species with a broad geographic range in the Americas and the Pacific  
847 islands. Flower and fruit morphology for each species is shown, and the island location  
848 and geographic range is indicated. Branch lengths on the phylogeny are not to scale but  
849 notable divergence times are labeled.

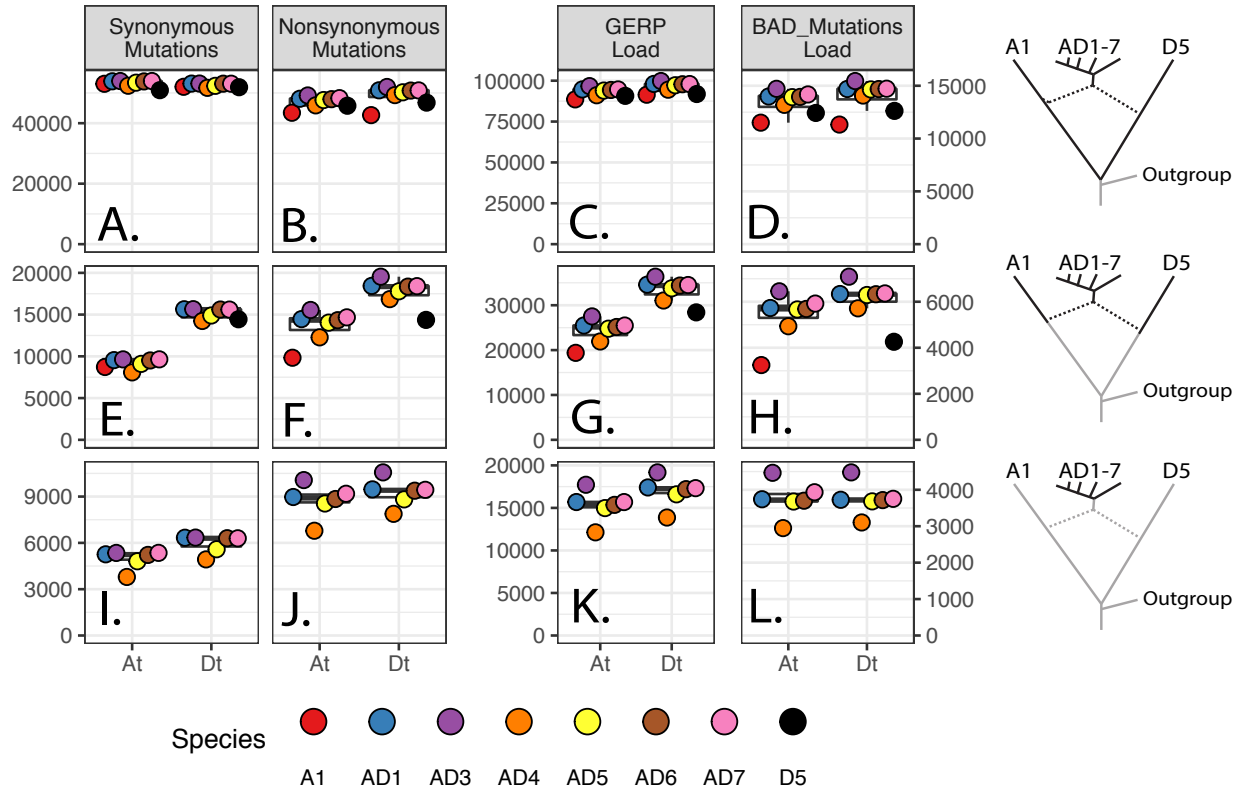

850

851 **Figure 2: Derived Mutations and Deleterious Loads at Three Phylogenetic Depths**

852 Number of derived synonymous, nonsynonymous, and deleterious mutations in the  
 853 CDS regions of 8,884 pairs of homoeologs (17,768 genes in total) in eight cotton  
 854 species at three phylogenetic depths (indicated by bold branches in phylogeny at right).  
 855 For all panels, the ancestral state of each SNP was determined using three Australian  
 856 cotton species as an outgroup (see Methods). The deepest phylogenetic depth (**ABCD**)  
 857 includes all derived mutations that originated since the divergence of the A and D  
 858 diploid progenitors; the middle row (**EFGH**) shows SNPs that are variable within each  
 859 subgenome and its associated progenitor diploid species; and the bottom row (**IJKL**)  
 860 shows SNPs that originated post-polyploidy and are variable within the polyploids. (**AEI**)  
 861 Synonymous mutations. (**BFJ**) Nonsynonymous mutations. The y-axis for both  
 862 synonymous and nonsynonymous is shown at left, and represents the sum of the

863 derived allele frequencies, interpreted as the average number of derived SNPs in that  
864 category in each species. **(CGK)** GERP Load of each species, calculated as the sum of  
865 (derived allele frequency \* GERP Score) for all SNP positions with GERP > 0. **(DHL)**  
866 Number of deleterious mutations in each species, calculated by BAD\_Mutations with  
867 Bonferroni-corrected significance (see Methods). Y-axis represents the sum of the  
868 derived allele frequencies, and indicates the average number of deleterious mutations in  
869 each species at a given phylogenetic depth. **Note:** for **(EFGH)**, comparisons between  
870 subgenomes cannot be made because the D5 diploid is more distantly related to the D  
871 subgenome than the A1 diploid is related to the A subgenome. Therefore, we would  
872 expect a larger number of derived mutations in D than A simply due to evolutionary  
873 history rather than to polyploidization *per se*.

874

875

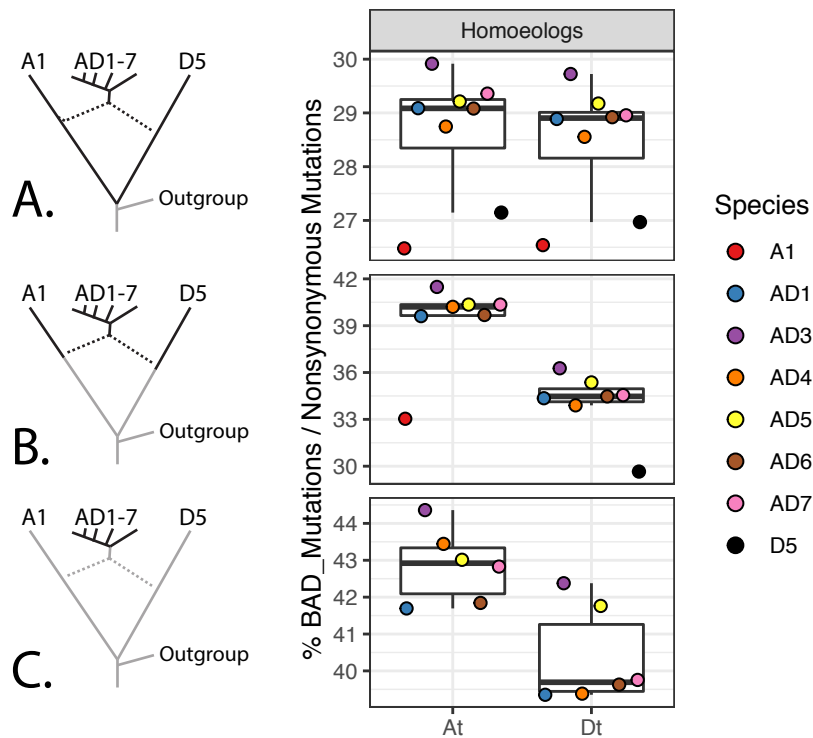

876

877 **Figure 3: Proportions of All Nonsynonymous Mutations That Are Deleterious**

878 Rows **A**, **B**, and **C** summarize SNPs segregating within the entire clade, within each  
879 subgenome and its respective progenitor diploid, and within each subgenome, as  
880 indicated by the bolded branches along the phylogeny at left. Values indicate the  
881 proportion of nonsynonymous SNPs that are deleterious within 8,884 homoeologous  
882 pairs (17,768 total genes) that are syntenically conserved between the two subgenomes  
883 of *G. hirsutum* (see Methods for filtering criteria). For example, the values in row A are  
884 calculated by dividing the values in Figure 2D by the values in Figure 2B for each  
885 species. **Note:** Similar to Figure 2, comparisons between subgenomes in row **B** reflect  
886 differing phylogenetic distances, not asymmetries between the subgenomes and/or their  
887 diploid progenitors.

888

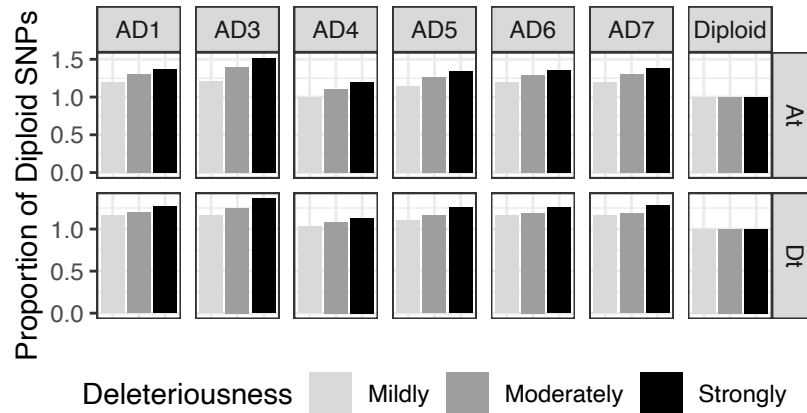

889

890 **Figure 4: Relative Increase Of Deleterious Mutations Among GERP Categories in**  
891 **Polyploids Compared to Diploids**

892 For SNPs that originated since the divergence of each subgenome from its diploid  
893 progenitor, we plotted the relative increase in deleterious alleles across three GERP  
894 load categories: mildly deleterious ( $0 < \text{GERP} \leq 2$ ; light gray), moderately deleterious  
895 ( $2 < \text{GERP} \leq 4$ ; gray), and strongly deleterious ( $4 < \text{GERP} \leq 6$ ; black). We used the diploid  
896 as the reference population, meaning that the relative increase of GERP load in the  
897 diploid is always equal to one for all categories. In both subgenomes of all polyploids,  
898 strongly deleterious mutations had the greatest relative increase compared to the  
899 diploids, followed by the moderately deleterious mutations, and finally, mildly deleterious  
900 mutations. This pattern does not fit the expected patterns under demographic models  
901 alone, where most of the changes between two populations should be seen in mildly or  
902 moderately deleterious mutations. However, under a model where recessive deleterious  
903 mutations are masked by their homoeologs, we would expect that strongly deleterious  
904 mutations would accumulate faster than moderately or mildly mutations (i.e the pattern  
905 we see here) due to the correlation between the recessivity of a mutation ( $h$ ) and its  
906 selection coefficient ( $s$ ).

907



908 **Table 1: Nucleotide Diversity ( $\pi$ ) in 8,884 Homoeologs in Eight *Gossypium***  
909 **Species, By Subgenome**

| Species              | Species Code | At Subgenome | Dt Subgenome |
|----------------------|--------------|--------------|--------------|
| <i>G. herbaceum</i>  | A1           | 7.41E-04     |              |
| <i>G. raimondii</i>  | D5           |              | 2.36E-04     |
| <i>G. hirsutum</i>   | AD1          | 6.69E-04     | 7.06E-04     |
| <i>G. tomentosum</i> | AD3          | 1.75E-04     | 1.67E-04     |
| <i>G. mustelinum</i> | AD4          | 2.64E-04     | 3.15E-04     |
| <i>G. darwinii</i>   | AD5          | 1.71E-04     | 1.60E-04     |
| <i>G. ekmanianum</i> | AD6          | 7.75E-04     | 7.67E-04     |
| <i>G. stephensii</i> | AD7          | 4.94E-05     | 5.59E-05     |

910

911

912

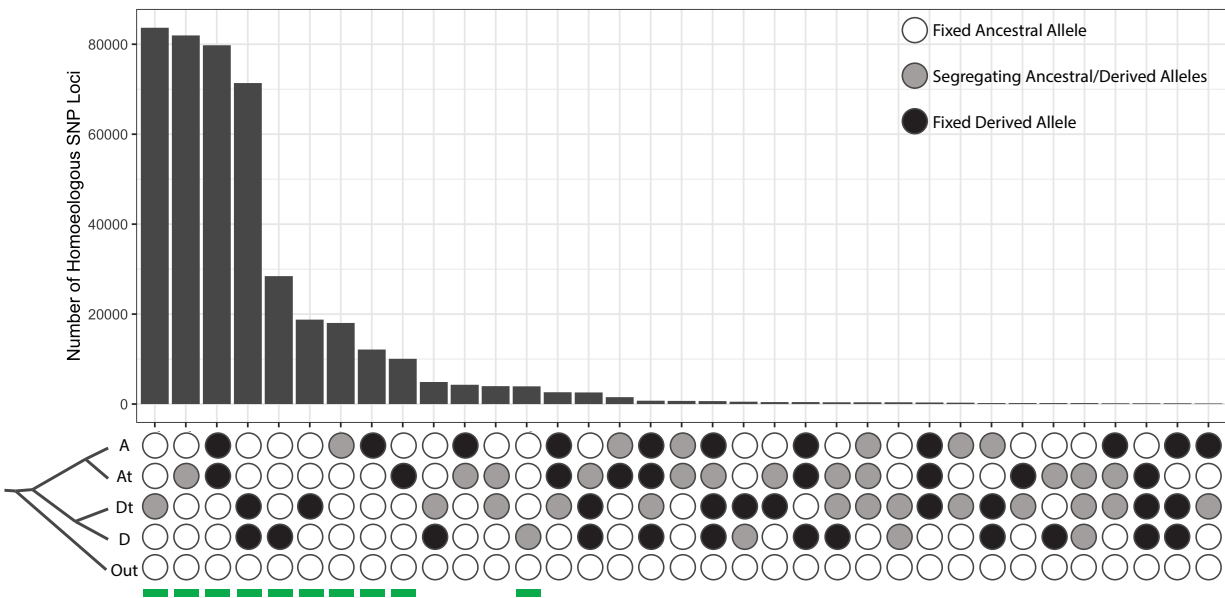

913

914 **Supplementary Figure 1: UpSet Plot of Derived Homoeologous SNPs Among**  
915 **8,884 Syntenic Homoeologous Gene Pairs**

916 To identify SNPs that may have potentially arisen from causes other than simple  
917 nucleotide substitutions (e.g., sequencing error, gene conversion), we plotted the  
918 frequency of polarized (ancestral vs derived) SNPs across the four major clades of  
919 *Gossypium* allopolyploid genomes (A diploid, At subgenome, Dt subgenome, D diploid).  
920 Bottom of the UpSet plot shows the phylogenetic positions of these 4 groups, as well as  
921 the ancestral state used for polarization. For simplicity, we collapsed all polyploids into a  
922 single group, but split them by subgenome (e.g. the At row indicates the At subgenome  
923 in all 6 allopolyploids in this analysis). White bubbles indicate that only ancestral alleles  
924 were identified in that species or subgenome; black bubbles denote SNP sites where  
925 only derived alleles were identified; grey bubbles represent SNP sites where both  
926 ancestral and derived alleles were identified. Only the top 35 SNP groups are shown.  
927 Groups with a green line underneath indicate SNP patterns that can be explained by a

928 single mutational event with no homoplasy (e.g. from incomplete lineage sorting or  
929 recurrent mutation), and were retained for subsequent analyses involving the 8,884  
930 homoeologous gene pairs.

931

932

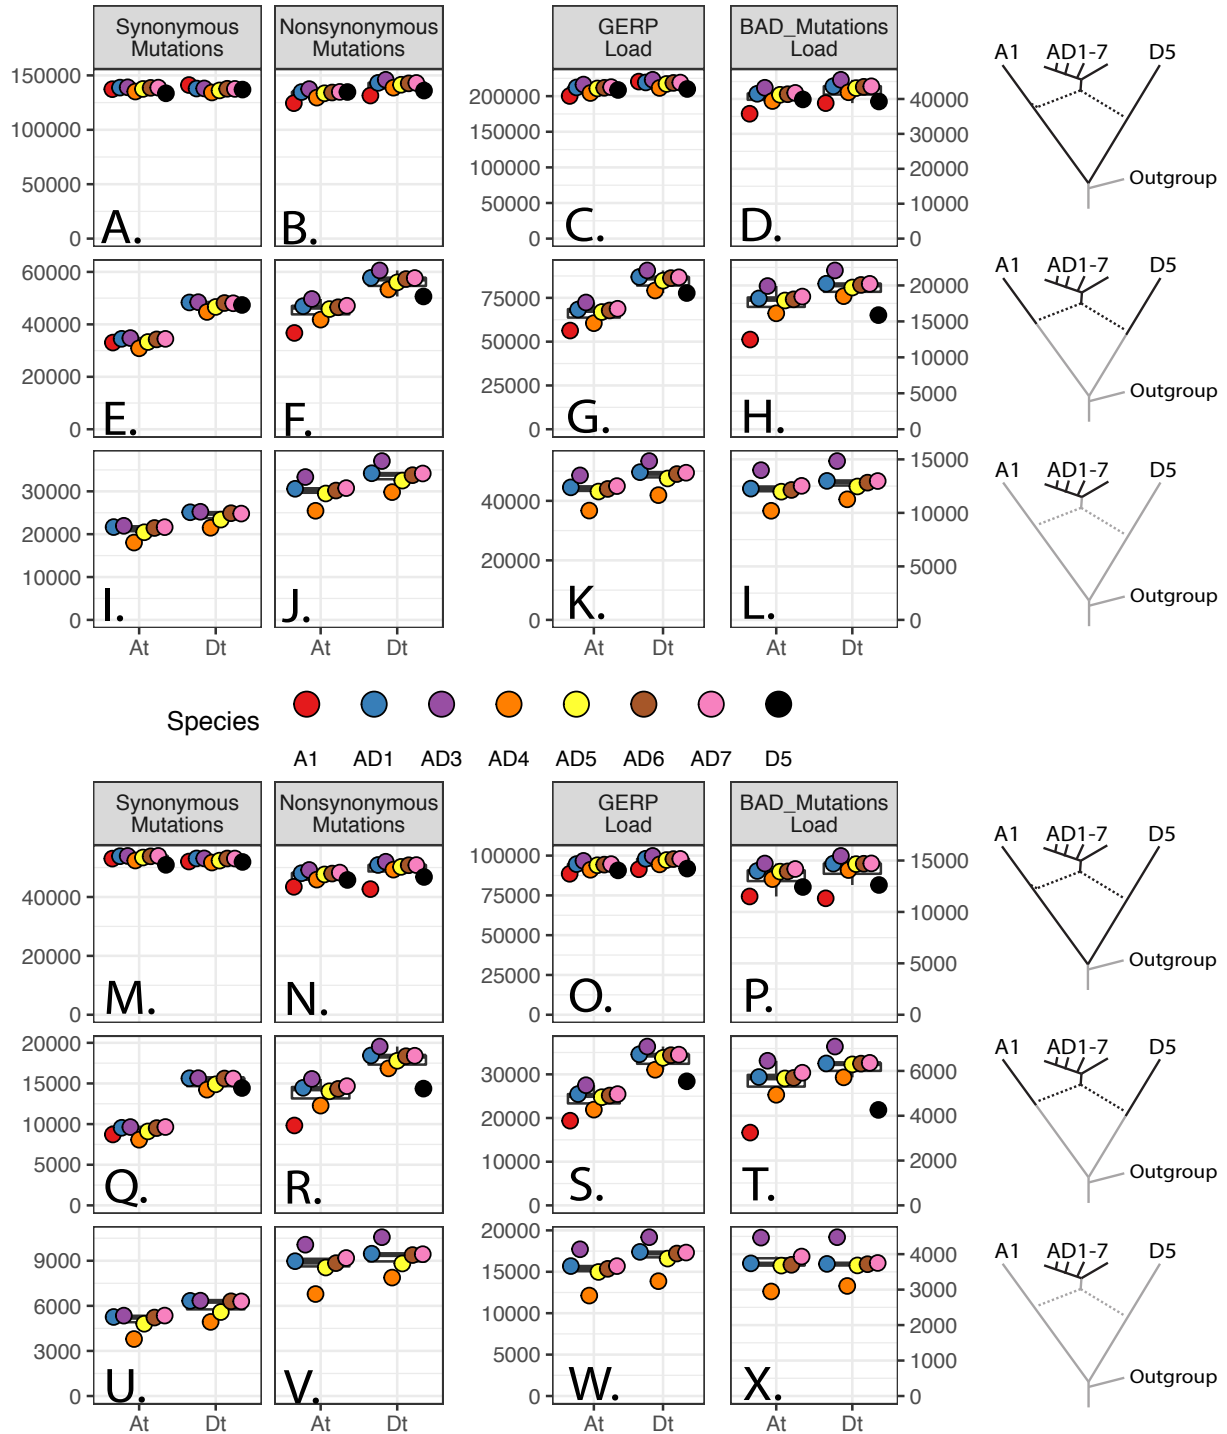

937 CDS regions of 8,884 pairs of homoeologs (17,768 genes in total) in eight cotton  
938 species at three phylogenetic depths (indicated by bold branches of phylogeny at right).  
939 For all panels, the ancestral state of each SNP was determined using three Australian  
940 cottons as an outgroup (see Methods). The deepest phylogenetic depth (**ABCD**)  
941 includes all derived mutations that originated since the divergence of the A and D  
942 diploid progenitors; the middle row (**EFGH**) shows SNPs that are variable within each  
943 subgenome and its associated progenitor diploid species; and the bottom row (**IJKL**)  
944 shows SNPs that originated post-polyploidy and are variable within the polyploids. (**AEI**)  
945 Synonymous mutations. (**BFJ**) Nonsynonymous mutations. The y-axis for both  
946 synonymous and nonsynonymous is shown at left, and represents the sum of the  
947 derived allele frequencies, interpreted as the average number of derived SNPs in that  
948 category in each species. (**CGK**) GERP Load of each species, calculated as the sum of  
949 (derived allele frequency \* GERP Score) for all SNP positions with GERP > 0. (**DHL**)  
950 Number of deleterious mutations in each species, calculated by BAD\_Mutations with  
951 bonferroni corrected significance (see Methods). Y-axis represents the sum of the  
952 derived allele frequencies, and indicates the average number of deleterious mutations in  
953 each species at a given phylogenetic depth. **Note:** for (**EFGH**), comparisons between  
954 subgenomes cannot be made because the D5 diploid is more distantly related to the D  
955 subgenome than the A1 diploid is related to the A subgenome. Therefore, we would  
956 expect a larger number of derived mutations in D than A simply due to evolutionary  
957 history rather than to polyploidization *per se*. The panels above the figure legend are  
958 identical to those presented in Figure 2. The panels below the figure legend (**M-X**) follow  
959 the same order as (**A-L**), but represent the genome-wide totals without any filtering

960 based on homoeologs or potential sites that are due to gene loss, mapping biases, or  
961 homoeologous gene conversion and is provided to demonstrate that our filtering criteria  
962 did not have a noticeable impact on the patterns of SNPs that we observed, and that  
963 homoeologous interactions have a minimal effect on patterns of evolution following  
964 allopolyploidy in *Gossypium*.  
965

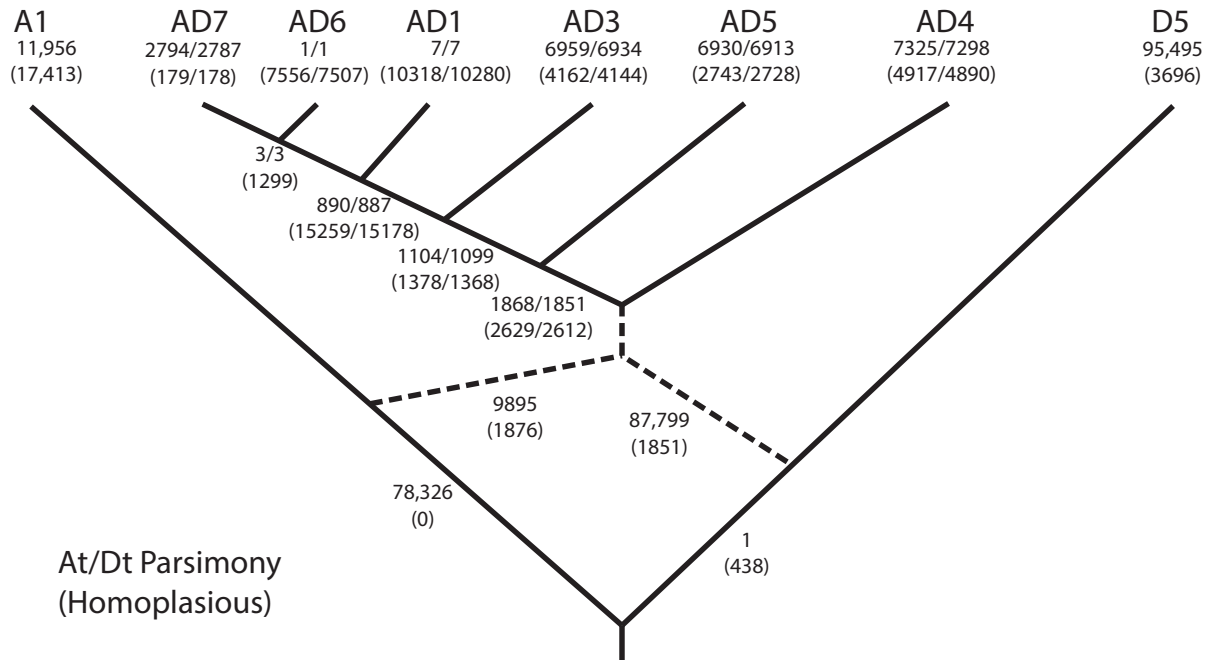

966

### 967 **Supplementary Figure 3: Phylogenetic Positions of Derived Deleterious SNPs**

968 For SNPs that passed the filtering from Supplementary Figure 1, we placed the origin of  
969 the SNP on the phylogenetic tree using parsimony. Numbers in the format of “X/Y”  
970 indicate the number of SNPs found in the “At/Dt” subgenome. Numbers above the  
971 parentheses indicate SNPs that are unequivocally placed on the tree in either the At or  
972 Dt subgenome. Numbers in parentheses indicate SNPs that are homoplasious, and the  
973 position of the number represents the phylogenetic position of the most recent common  
974 ancestor of all species that contain at least one derived SNP. Numbers in the  
975 parentheses at the tips of the tree indicate SNPs that are segregating within that  
976 species but are not found in any other species. Note: the high amount of homoplasious  
977 SNPs at the base of the AD1, AD6, and AD7 clade is most likely caused by recent  
978 hybridization or introgression of AD1 into AD6, as also indicated in Supplementary  
979 Figure 5.

980

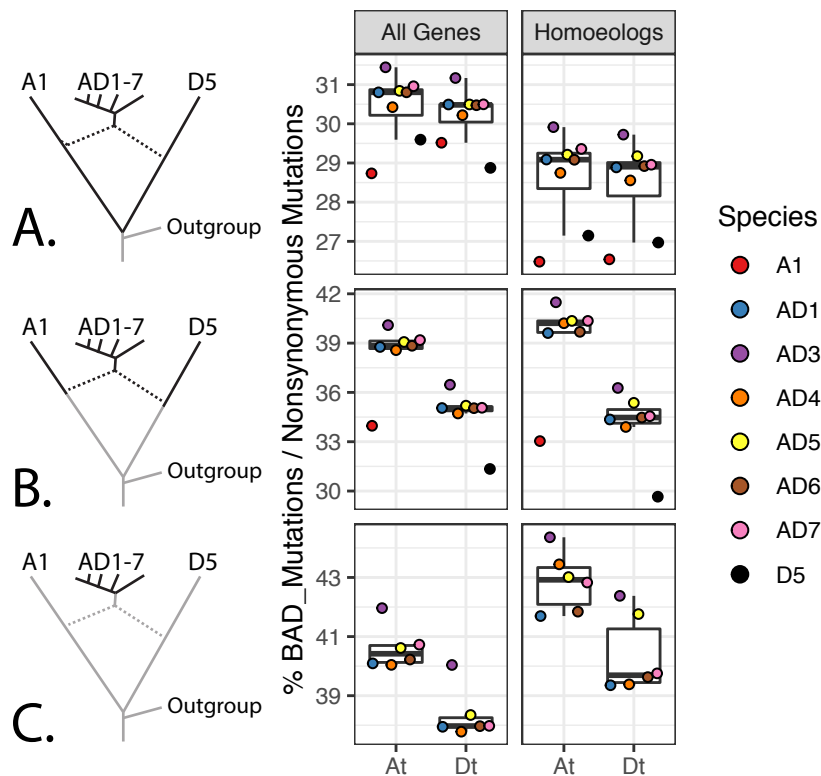

981

982 **Supplementary Figure 4: Genome-Wide Proportions of All Nonsynonymous**  
983 **Mutations That Are Deleterious**

984 Rows **A**, **B**, and **C** summarize SNPs segregating within the entire clade, within each  
985 subgenome and its respective progenitor diploid, and within each subgenome, as  
986 indicated by the bolded branches along the phylogeny at left. **(A)** Proportion of all  
987 nonsynonymous SNPs that are deleterious genome-wide within each subgenome. **(B)**  
988 Proportion of nonsynonymous SNPs that are deleterious within 8,884 homoeologous  
989 pairs (17,768 total genes) that are syntenically conserved between the two subgenomes  
990 of *G. hirsutum* (see Methods for filtering criteria). Note: Similar to Figure 2, comparisons  
991 between subgenomes in row **B** reflect differing phylogenetic distances, not asymmetries  
992 between the subgenomes and/or their diploid progenitors.



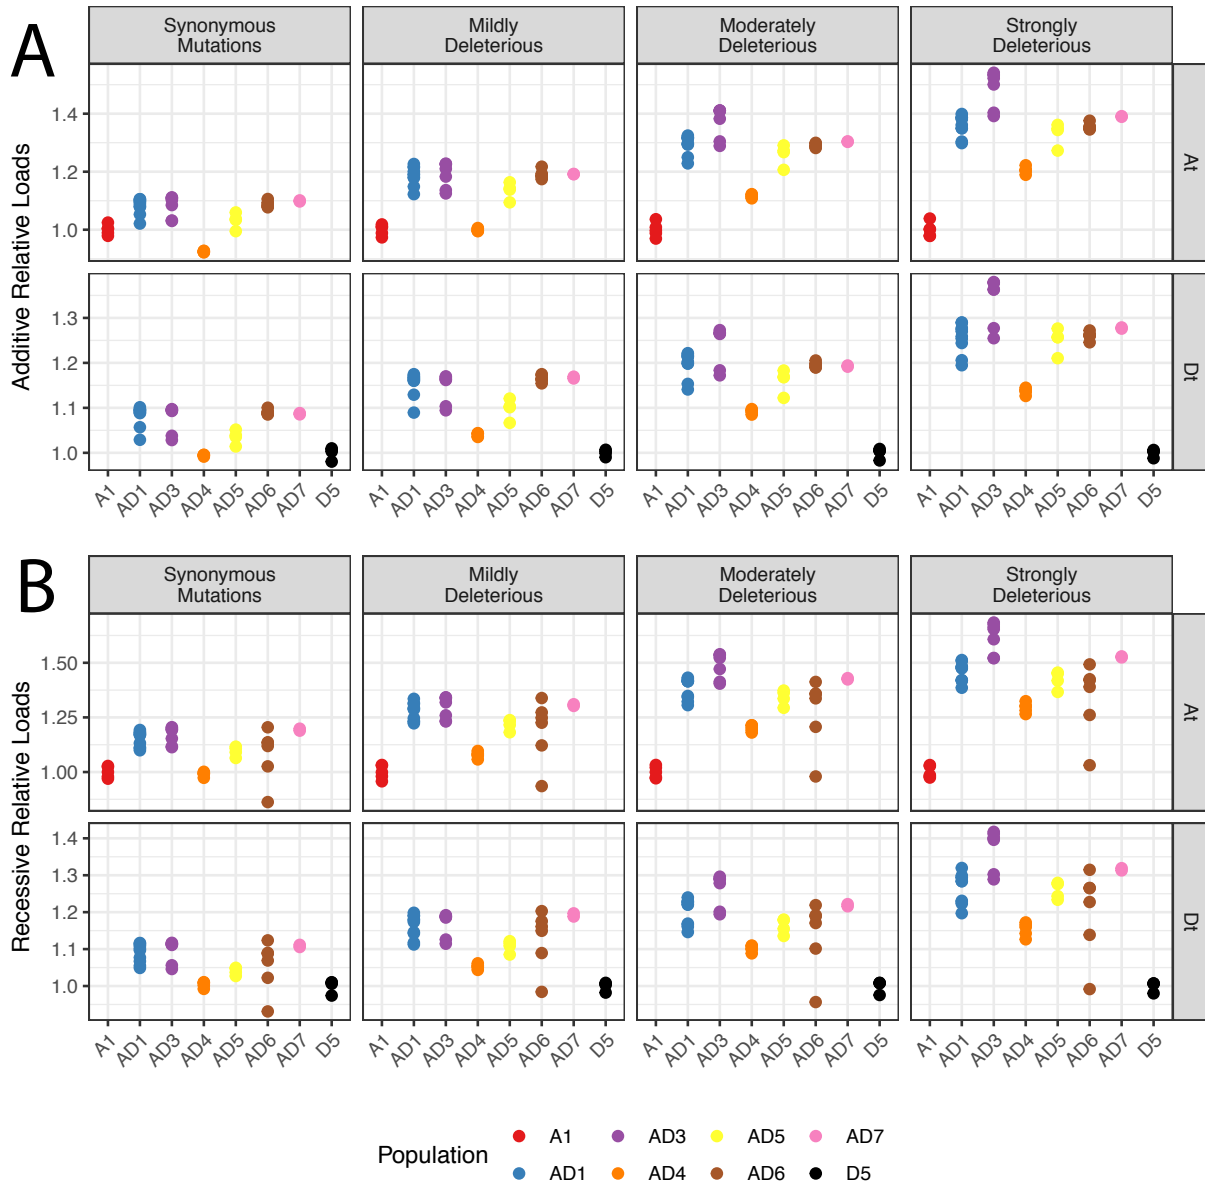

993

994 **Supplementary Figure 5: Additive and Recessive Models of Deleterious Mutation**

995 **Accumulation**

996 Relative load of synonymous sites and varying GERP categories from an **(A)** additive

997 model (i.e. counting all SNPs) and **(B)** recessive model (i.e. counting all homozygous

998 SNPs in a homozygous state). Each point represents an individual, and the placement

999 of each point represents the relative increase or decrease in the number of SNPs

1000 relative to the average of the number of SNPs in the diploid (A1 for At, D5 for Dt). Note:  
1001 The high variance in the recessive load for AD6 reflects a high number of sites that are  
1002 heterozygous. This is mostly likely due to recent hybridization or introgression from  
1003 AD1, which is also indicated by a high amount of incomplete lineage sorting between  
1004 AD1, AD6, and AD7 in Supplementary Figure 3.
